# Supplementary material
Source: Springer Nature journal article supplement (https://www.springermedizin.de/resource/supplementary/12958_2003_36_MOESM10_ESM.pdf/9566230)
Supplement: MOESM10 [file 9566230]

**ER $\alpha$  and ER $\beta$  expression during asymmetric division and differentiation of villous trophoblast cells in vivo**

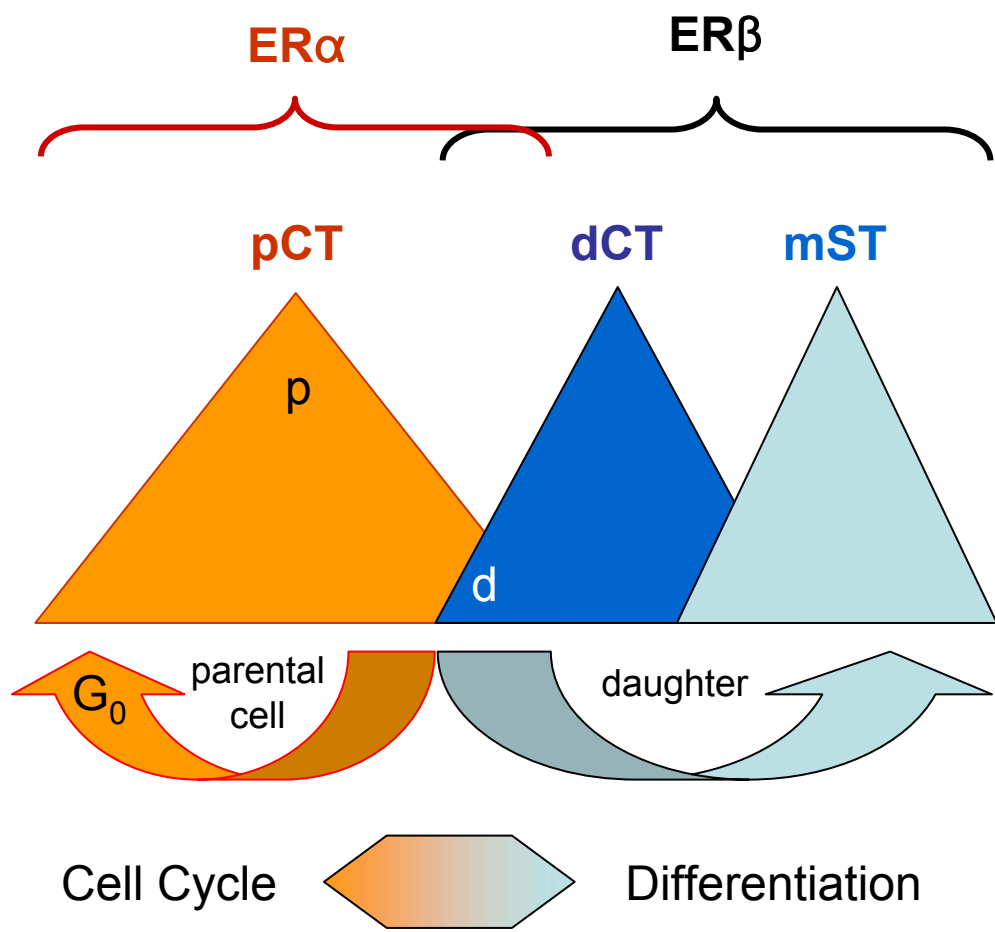

ER $\alpha$  nuclear

ER $\beta$  nuclear

ER $\beta$  cytoplasmic
